# Supplementary material for: Analyses of methylomes of upland and lowland switchgrass (Panicum virgatum) ecotypes using MeDIP-seq and BS-seq
Source: PubMed Central journal article supplement (PMC5678558; doi:10.1186/s12864-017-4218-0), 2017-11-07

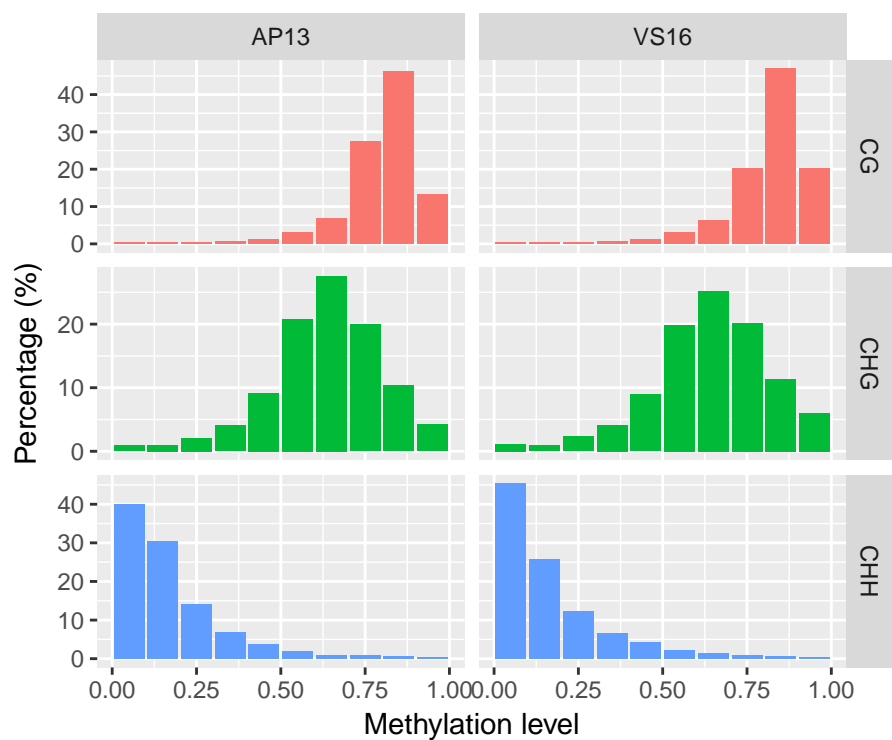

Supplement: 12864_2017_4218_MOESM7_ESM.pdf [file 12864_2017_4218_MOESM7_ESM.pdf]
